# Supplementary material
Source: Springer Nature journal article supplement (https://www.springermedizin.de/resource/supplementary/12884_2010_286_MOESM1_ESM.pdf/9457380)
Supplement: MOESM1 [file 9457380]

# Surveillance of 37,000 deliveries

Cross-sectional component

Eligible  
preterm births

Informed Consent  
X Refusals

All included  
preterm births  
( $\approx 3600$ )

Case-control component

Eligible term  
births

Informed Consent  
Y Refusals

First 1,055  
preterm births  
(cases)

1,055 term birth  
(controls)
